# Supplementary material for: Metabolic profiling shows pre‐existing mitochondrial dysfunction contributes to muscle loss in a model of ICU‐acquired weakness
Source: PubMed Central journal article supplement (PMC7567140; doi:10.1002/jcsm.12597), 2020-07-16
Supplement: JCSM-11-1321-s001.pdf [file JCSM-11-1321-s001.pdf]

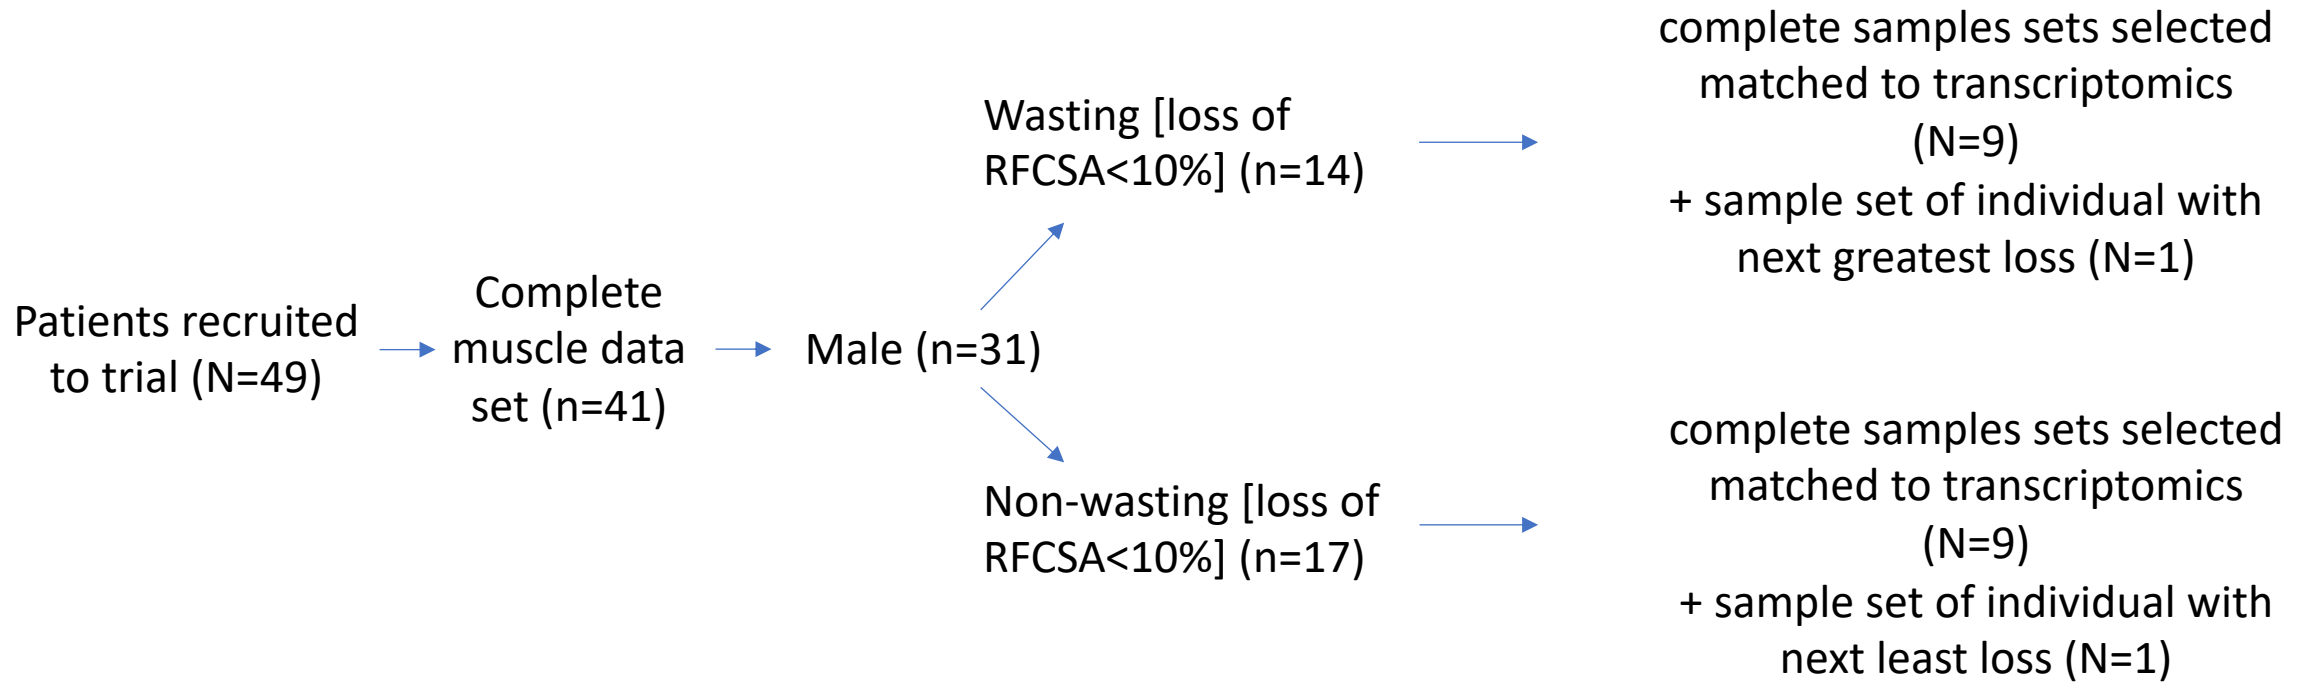

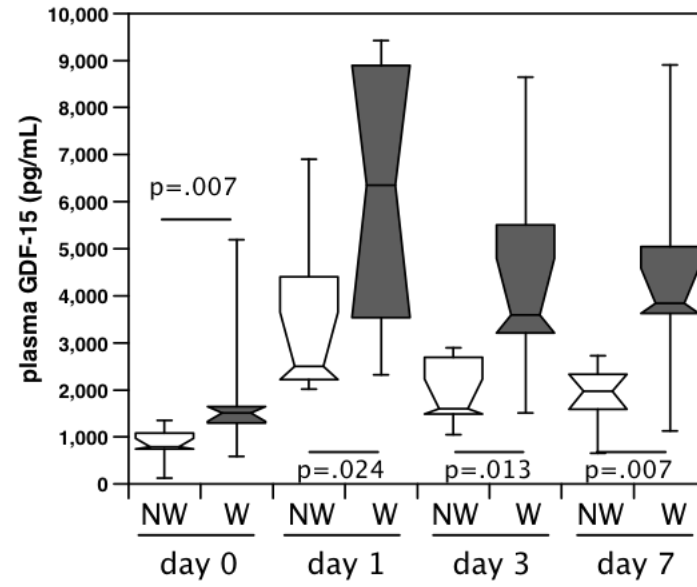

Figure S2. The effect of surgery on GDF-15 in the circulation of wasting and non-wasting patients. Surgery increased GDF-15 in both wasting and non-wasting patients with maximal GDF-15 found on day 1. Circulating GDF-15 was higher at all time points in wasting patients compared to non-wasting patients .

Figure S2

# biweight correlation module trait relationships day 0

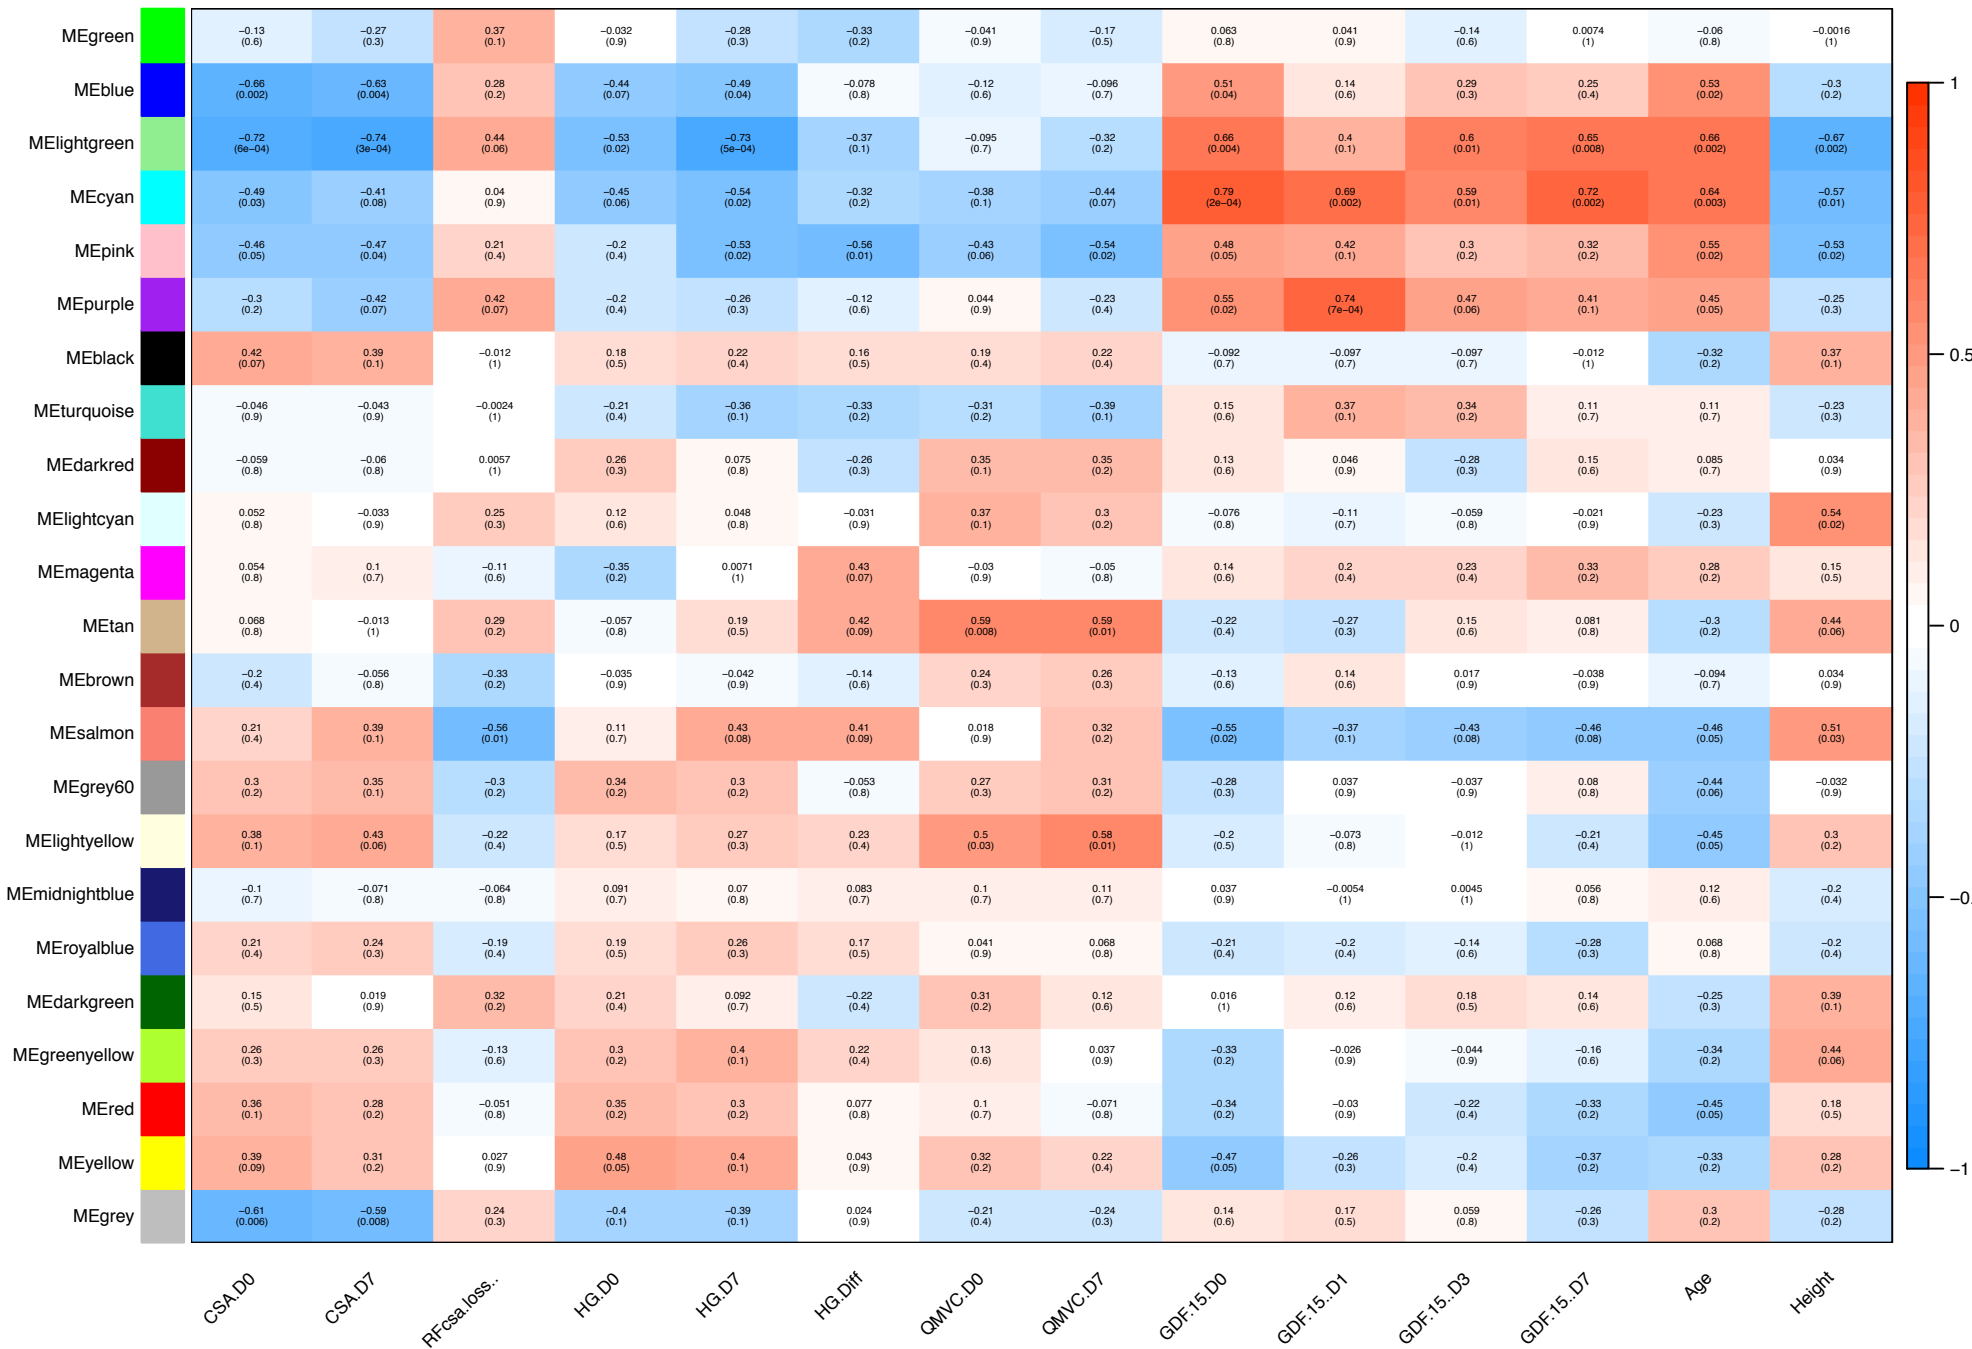

Figure S3. Whole genome co-expression network analysis (WGCNA) of plasma metabolites before surgery. Day 0 plasma metabolite levels were grouped using WGCNA then compared with physiological parameters and circulating GDF-15 levels (quantified by ELISA). Red demonstrates positive correlation and blue shows negative correlation. R and p Values calculated using robust biweight mid-correlation are shown in the appropriate box.

Figure S3

# biweight correlation module trait relationships day 1

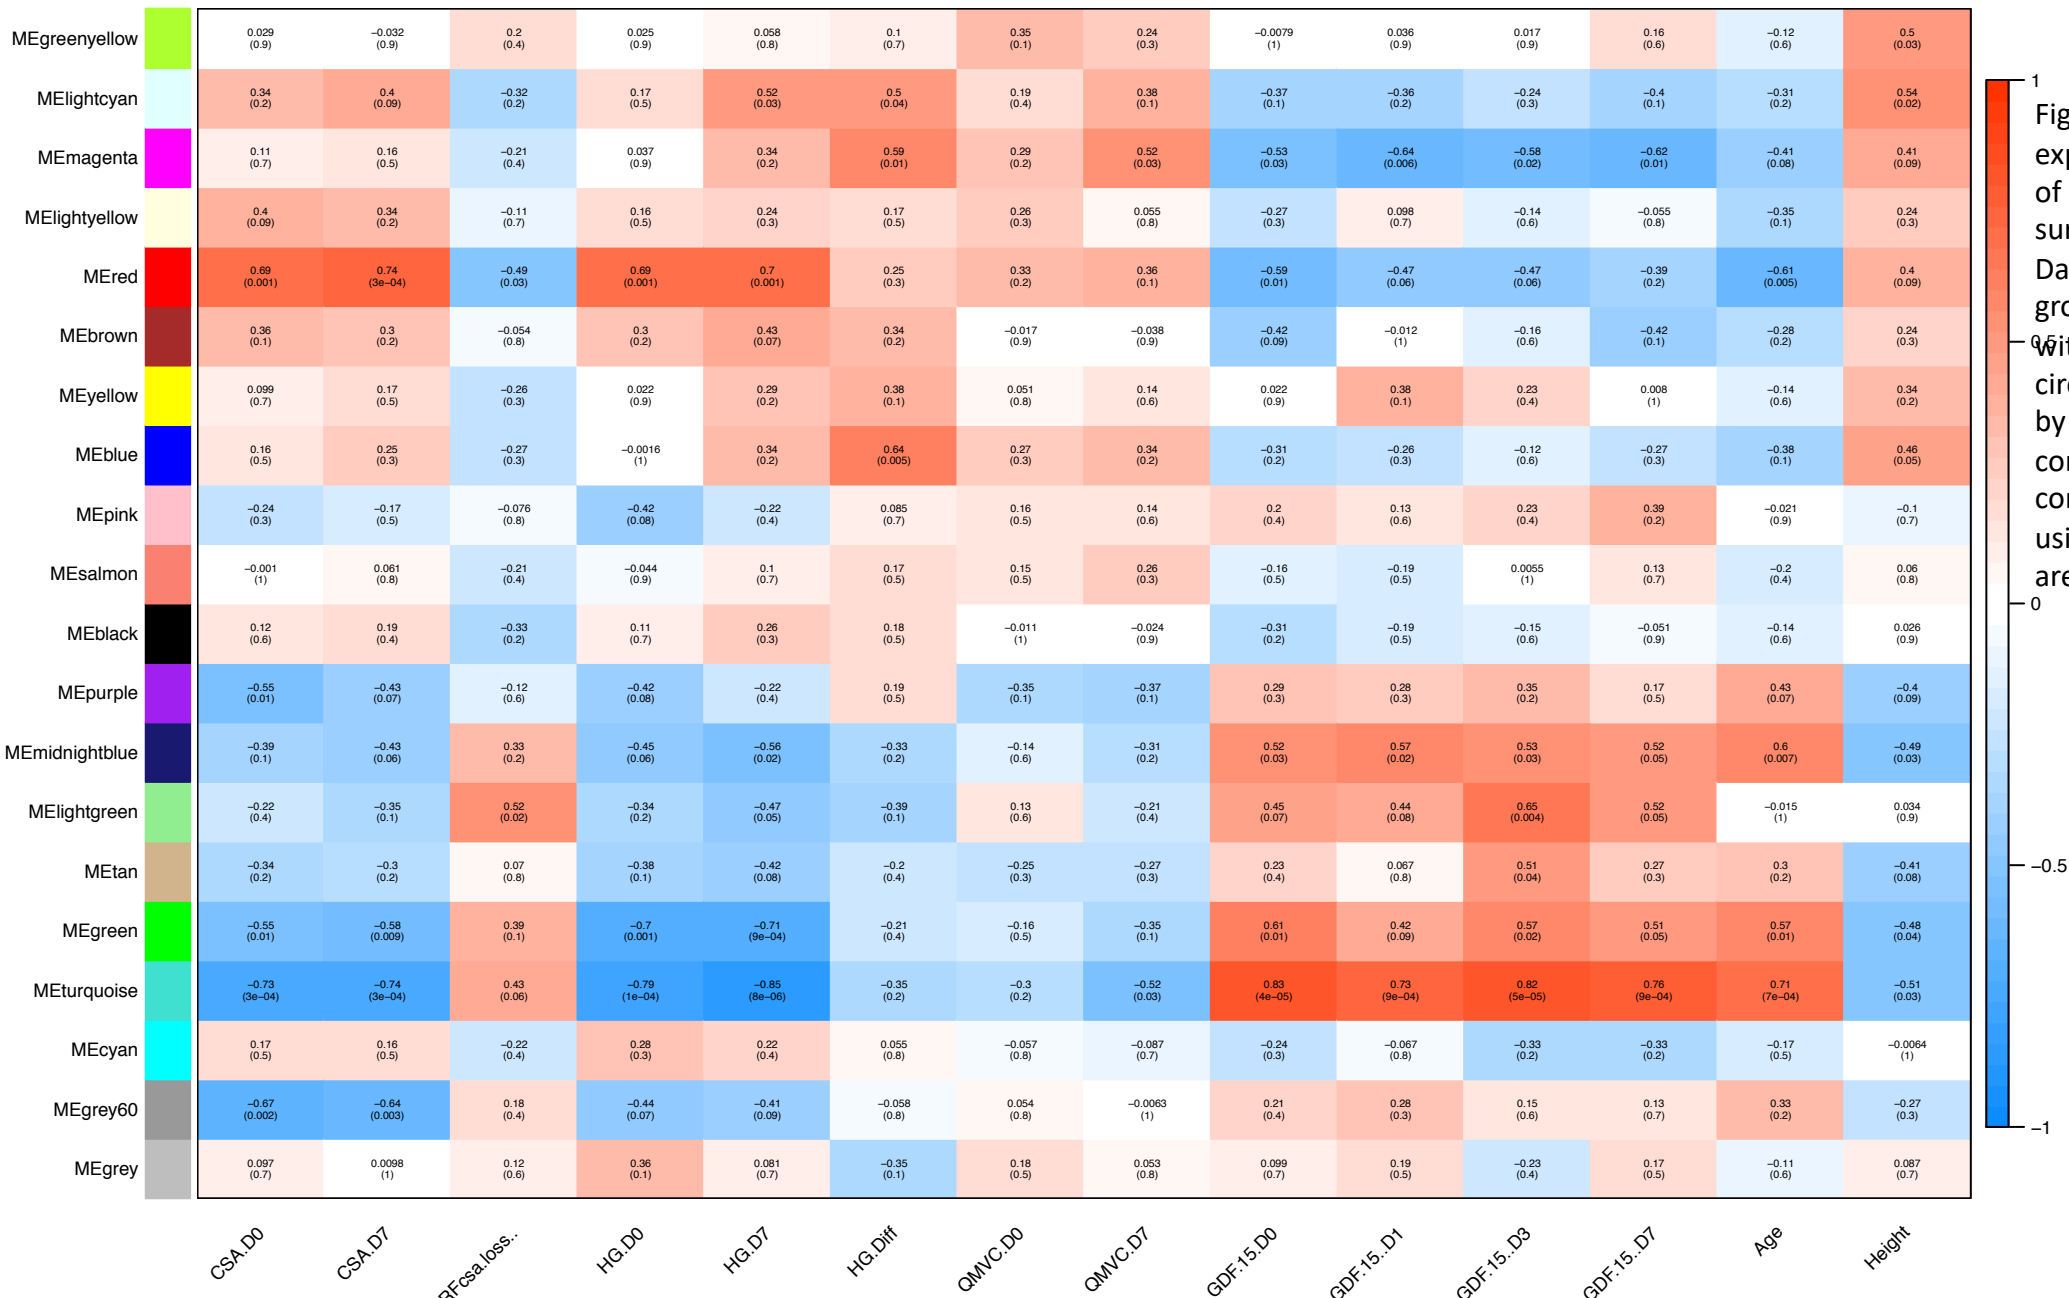

Figure S4. Whole genome co-expression network analysis (WGCNA) of plasma metabolites 1 day after surgery. Day 1 plasma metabolite levels were grouped using WGCNA then compared with physiological parameters and circulating GDF-15 levels (quantified by ELISA). Red demonstrates positive correlation and blue shows negative correlation. R and p Values calculated using robust biweight mid-correlation are shown in the appropriate box.

Figure S4

### biweight correlation module trait relationships day 3

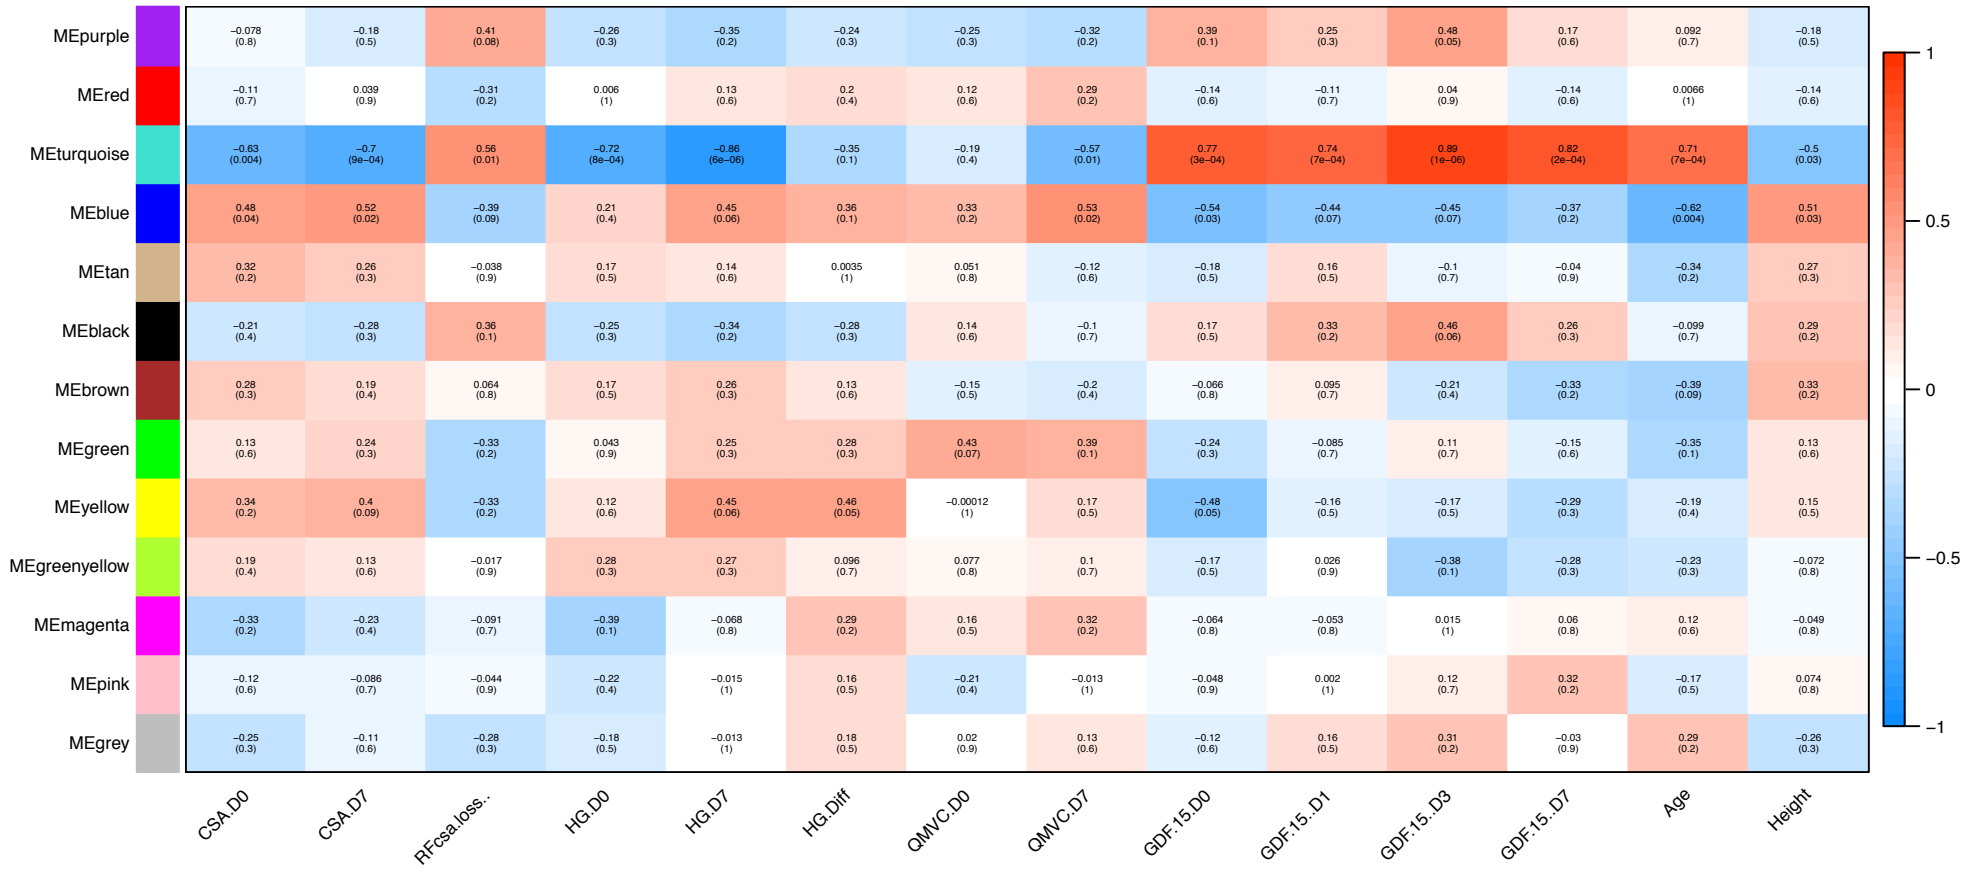

Figure S5. Whole genome co-expression network analysis (WGCNA) of plasma metabolites 3 days after surgery.

Day 3 plasma metabolite levels were grouped using WGCNA then compared with physiological parameters and circulating GDF-15 levels (quantified by ELISA). Red demonstrates positive correlation and blue shows negative correlation. R and p Values calculated using robust biweight mid-correlation are shown in the appropriate box.

Figure S5

## biweight correlation module trait relationships day 7

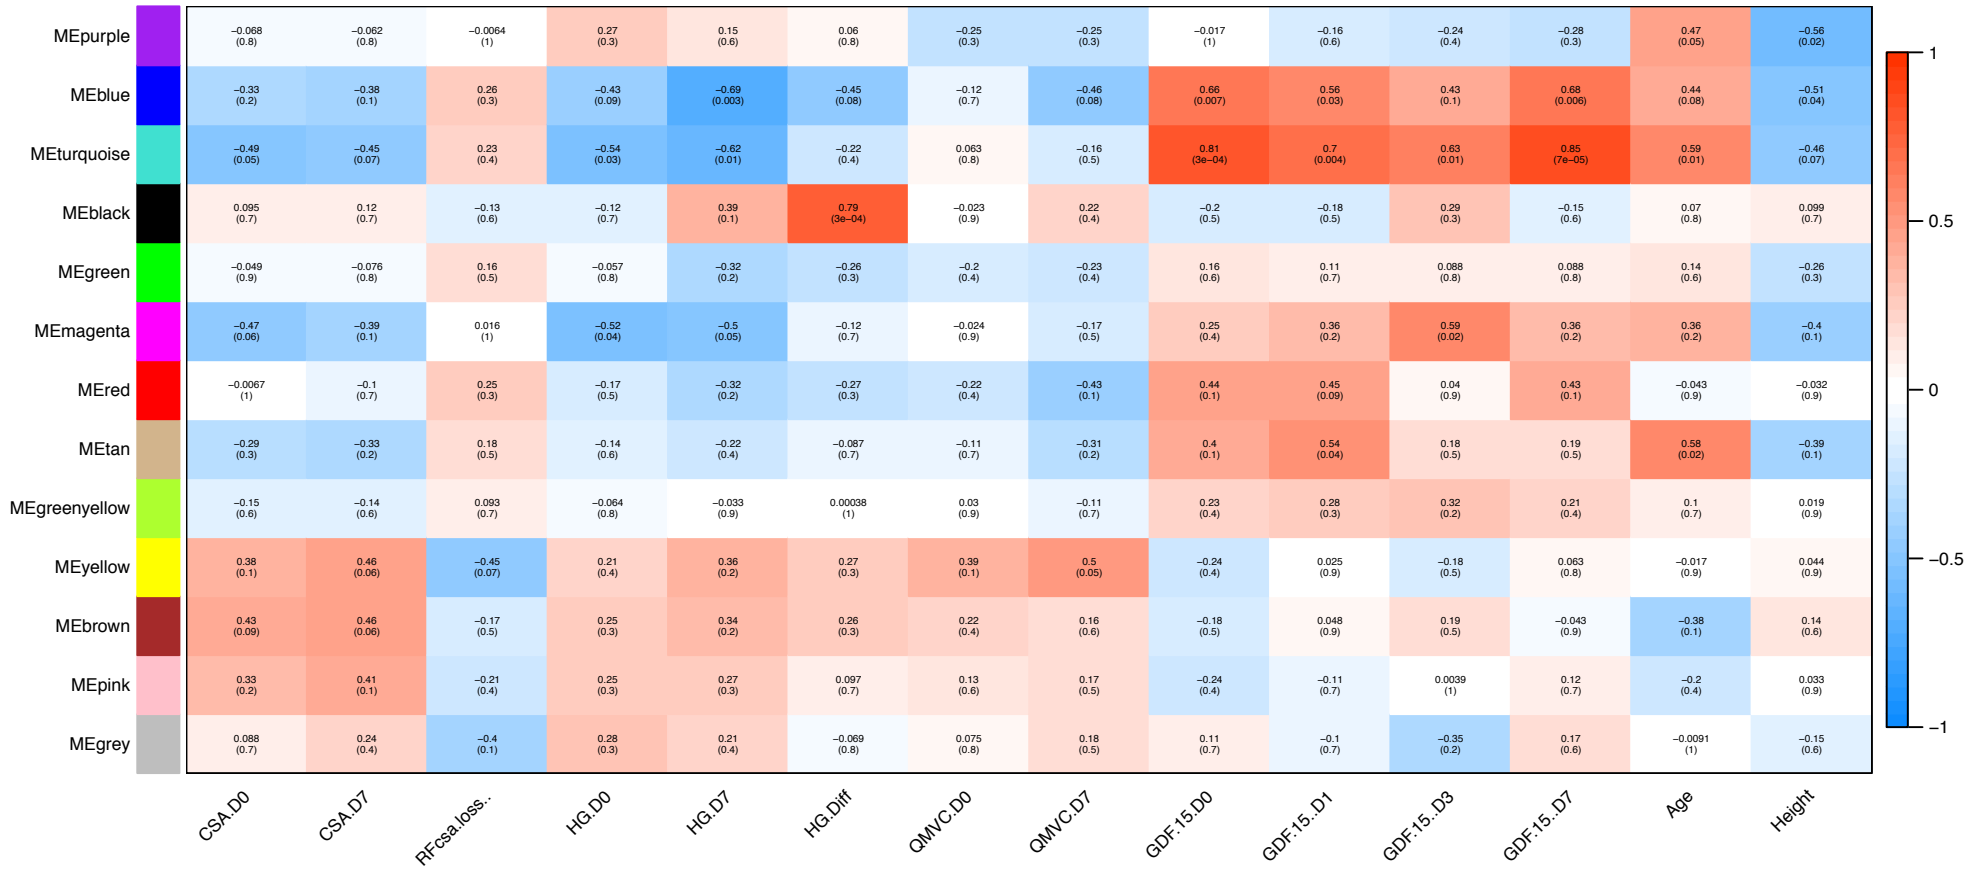

Figure S6. Whole genome co-expression network analysis (WGCNA) of plasma metabolites 7 days after surgery. Day 7 plasma metabolite levels were grouped using WGCNA then compared with physiological parameters and circulating GDF-15 levels (quantified by ELISA). Red demonstrates positive correlation and blue shows negative correlation. R and p Values calculated using robust biweight mid-correlation are shown in the appropriate box.

Figure S6

biweight correlation module trait rels

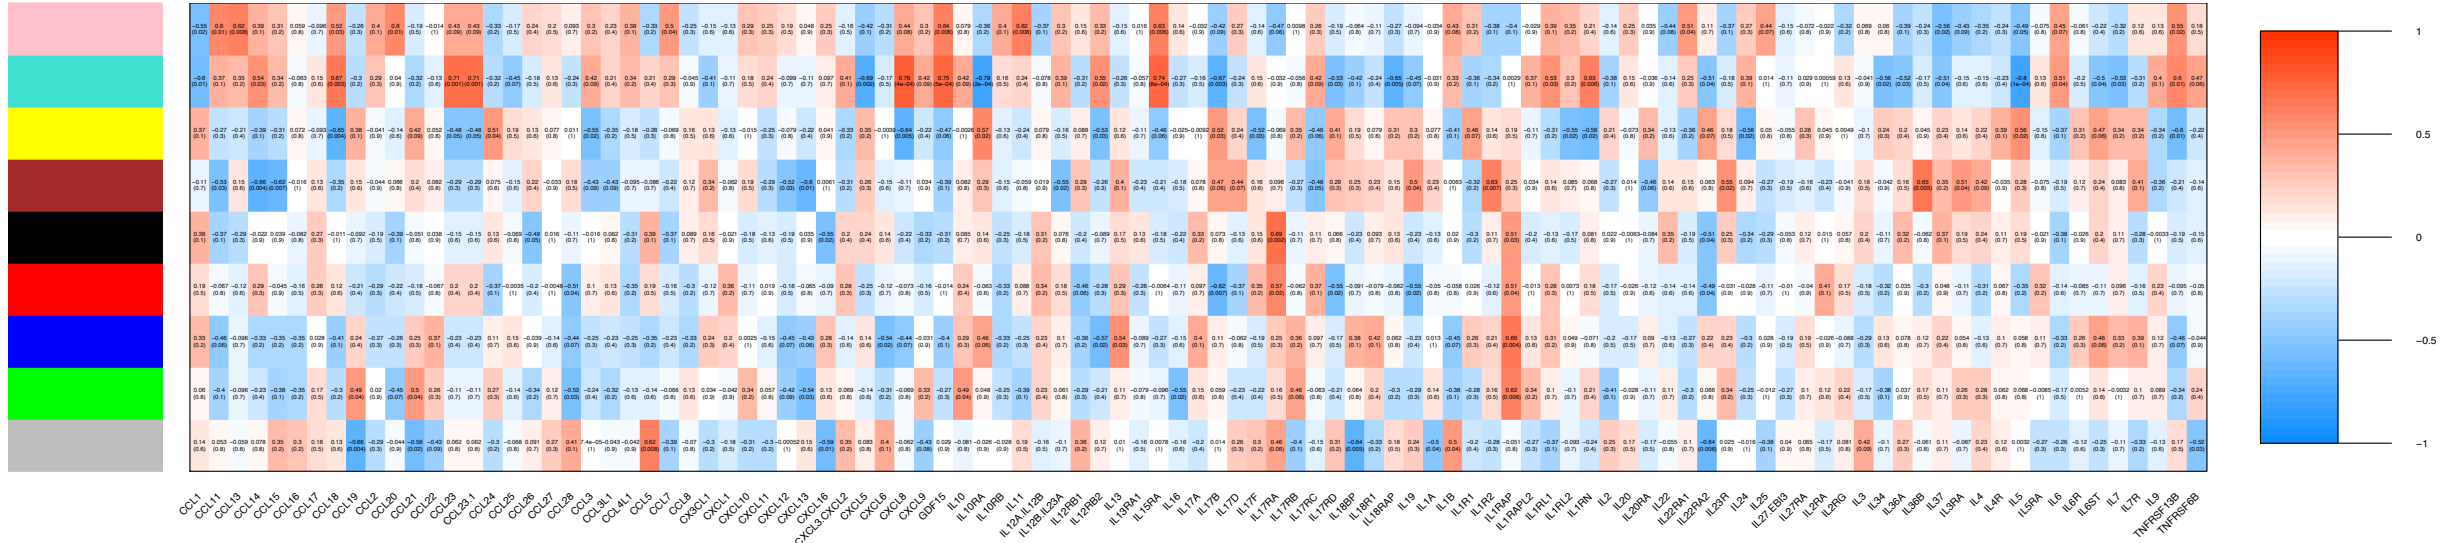

Figure S7. Whole genome co-expression network analysis (WGCNA) of plasma metabolites 1 day after surgery compared to plasma cytokines on the same day and their receptors.

Day 1 plasma metabolite levels were grouped using WGCNA then compared with circulating cytokines quantified by Somascan assay.. Red demonstrates positive correlation and blue shows negative correlation. R and p Values calculated using robust biweight mid-correlation are shown in the appropriate box.

Figure S7

### biweight correlation module trait rels

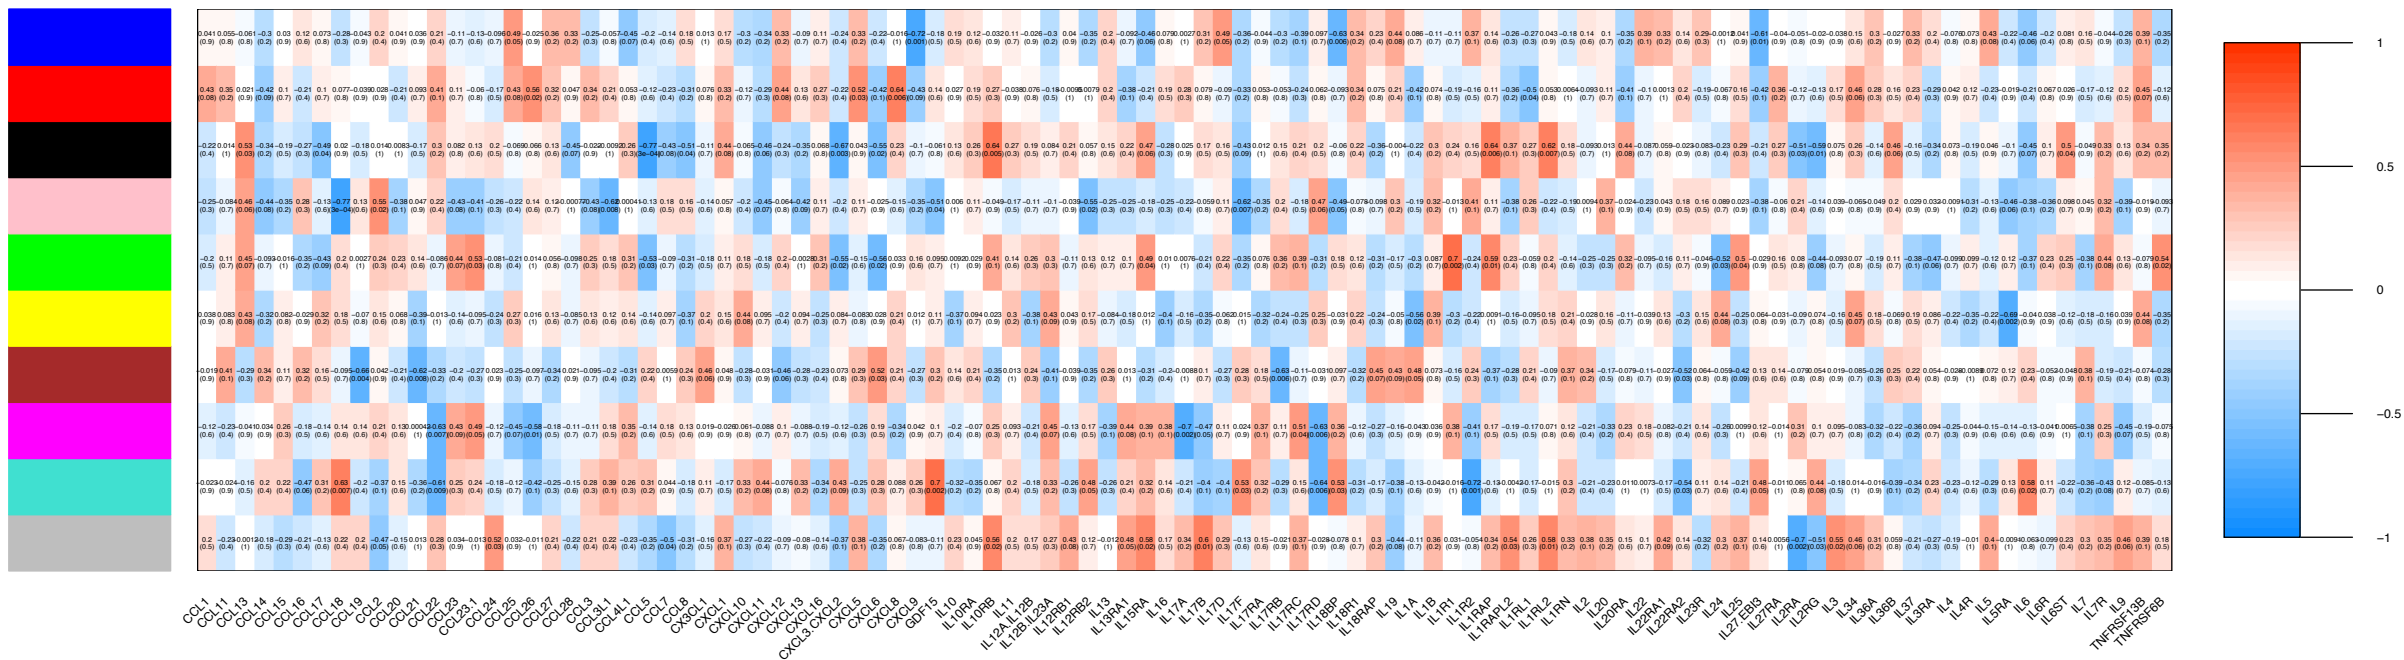

Figure S8. Whole genome co-expression network analysis (WGCNA) of plasma metabolites before surgery compared to plasma cytokines on the same day and their receptors.

Day 0 plasma metabolite levels were grouped using WGCNA then compared with circulating cytokines quantified by Somascan assay. Red demonstrates positive correlation and blue shows negative correlation. R and p Values calculated using robust biweight mid-correlation are shown in the appropriate box.

Figure S8
